# Supplementary material for: Pyridines as retarding agents in photoinduced thermal frontal cationic polymerization of epoxydes
Source: Royal Society of Chemistry journal article supplement (doi:10.1039/d1py01332g), 2021-01-01

## Electronic Supplementary information

### Pyridines as retarding agents in photoinduced thermal frontal cationic polymerization of epoxydes

X. Allonas\*, M. Lecompère, B. Gachet, A. Criqui, D. Maréchal, C. Croutxé-Barghorn

Figure S11. Delay in the thermal polymerization in the presence of 2,3-lutidine (left) and 2,4-lutidine (right). DIEPOX with 3 wt% of TPP<sup>+</sup> and 3 wt% of IBVE. Measurements made on 4g of formulation placed in a 2cm glass tube using Type K thermocouple.

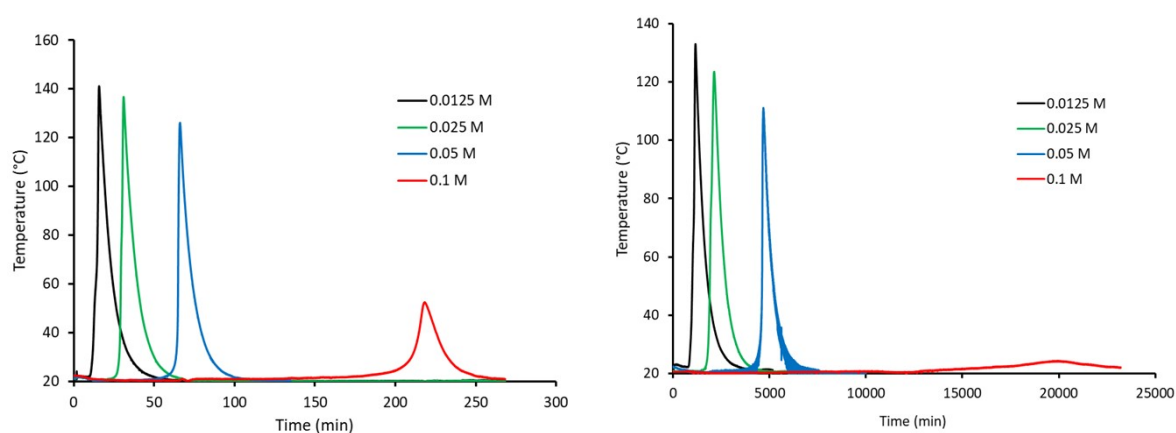

Figure S12. Delay in the thermal polymerization in the presence of 2,4,6-collidine. DIEPOX with 3 wt% of TPP<sup>+</sup> and 3 wt% of IBVE. Measurements made on 4g of formulation placed in a 2cm glass tube using Type K thermocouple.

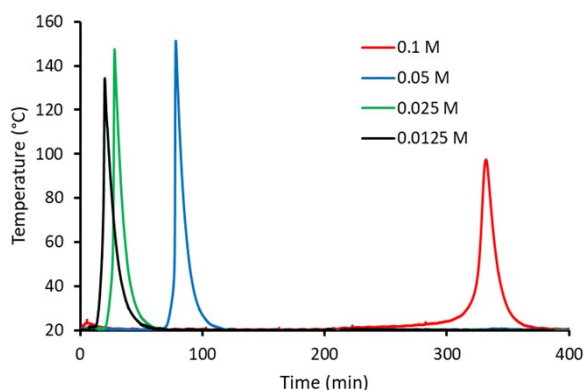

Supplement: d1py01332g1.pdf [file d1py01332g1.pdf]
